# Supplementary material
Source: MDPI journal article supplement (https://www.mdpi.com/2227-9717/10/10/1997)
Supplement: s1 [file s1]

## Supplementary Materials

# Synthesis, In Silico, and In Vitro Biological Evaluation of New Furan Hybrid Molecules

Stanimir Manolov <sup>1</sup>, Iliyan Ivanov <sup>1\*</sup>, Dimitar Bojilov <sup>1</sup> and Paraskev Nedialkov <sup>2</sup>

<sup>1</sup> Department of Organic Chemistry, Faculty of Chemistry, University of Plovdiv, 24 Tzar Assen Str., 4000 Plovdiv, Bulgaria; manolov@uni-plovdiv.net (S.M.); bozhilov@uni-plovdiv.net (D.B.)

<sup>2</sup> Department of Pharmacognosy, Faculty of Pharmacy, Medical University of Sofia, 2 Dunav Str., 1000 Sofia, Bulgaria; pnedialkov@pharmfac.mu-sofia.bg

\* Correspondence: iiliyan@abv.bg; Tel./Fax: +359-32-261-349

### Table of Contents:

|                                                                      |         |
|----------------------------------------------------------------------|---------|
| <b>Figure S1.</b> <sup>1</sup> H-NMR spectrum of compound <b>7a</b>  | page 4  |
| <b>Figure S2.</b> <sup>1</sup> H-NMR spectrum of compound <b>7b</b>  | page 5  |
| <b>Figure S3.</b> <sup>1</sup> H-NMR spectrum of compound <b>7c</b>  | page 6  |
| <b>Figure S4.</b> <sup>1</sup> H-NMR spectrum of compound <b>7d</b>  | page 7  |
| <b>Figure S5.</b> <sup>13</sup> C-NMR spectrum of compound <b>7a</b> | page 8  |
| <b>Figure S6.</b> <sup>13</sup> C-NMR spectrum of compound <b>7b</b> | page 9  |
| <b>Figure S7.</b> <sup>13</sup> C-NMR spectrum of compound <b>7c</b> | page 10 |
| <b>Figure S8.</b> <sup>13</sup> C-NMR spectrum of compound <b>7d</b> | page 11 |
| <b>Figure S9.</b> UV spectrum of compound <b>7a</b>                  | page 12 |

|                                                                                                                                     |                |
|-------------------------------------------------------------------------------------------------------------------------------------|----------------|
| <b>Figure S10.</b> UV spectrum of compound <b>7b</b>                                                                                | page <b>13</b> |
| <b>Figure S11.</b> UV spectrum of compound <b>7c</b>                                                                                | page <b>14</b> |
| <b>Figure S12.</b> UV spectrum of compound <b>7d</b>                                                                                | page <b>15</b> |
| <b>Figure S13.</b> ESI-HRMS of compound <b>7a</b>                                                                                   | page <b>16</b> |
| <b>Figure S14.</b> Mass spectrum of <b>7a</b> obtained by positive ion<br>ESI-MS/MS. Proposed fragmentation of protonated <b>7a</b> | page <b>17</b> |
| <b>Figure S15.</b> ESI-HRMS of compound <b>7b</b>                                                                                   | page <b>18</b> |
| <b>Figure S16.</b> Mass spectrum of <b>7b</b> obtained by positive ion<br>ESI-MS/MS. Proposed fragmentation of protonated <b>7b</b> | page <b>19</b> |
| <b>Figure S17.</b> ESI-HRMS of compound <b>7c</b>                                                                                   | page <b>20</b> |
| <b>Figure S18.</b> Mass spectrum of <b>7c</b> obtained by positive ion<br>ESI-MS/MS. Proposed fragmentation of protonated <b>7c</b> | page <b>21</b> |
| <b>Figure S19.</b> ESI-HRMS of compound <b>7d</b>                                                                                   | page <b>22</b> |
| <b>Figure S20.</b> Mass spectrum of <b>7d</b> obtained by positive ion<br>ESI-MS/MS. Proposed fragmentation of protonated <b>7d</b> | page <b>23</b> |

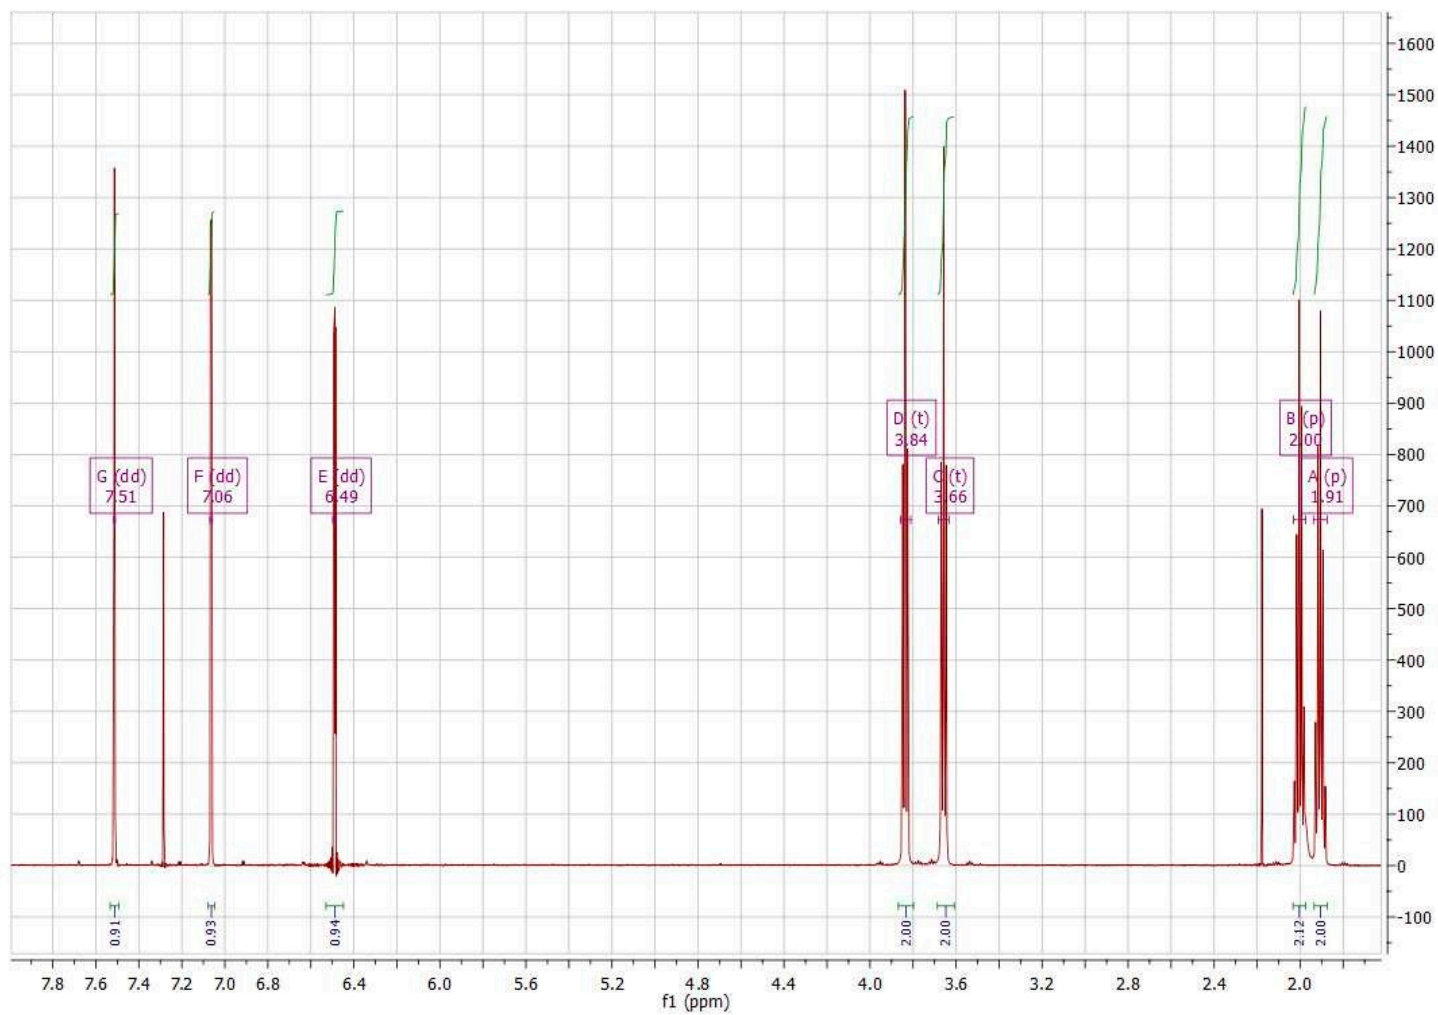

**Figure S1.**  $^1\text{H}$ -NMR spectrum of compound 7a.

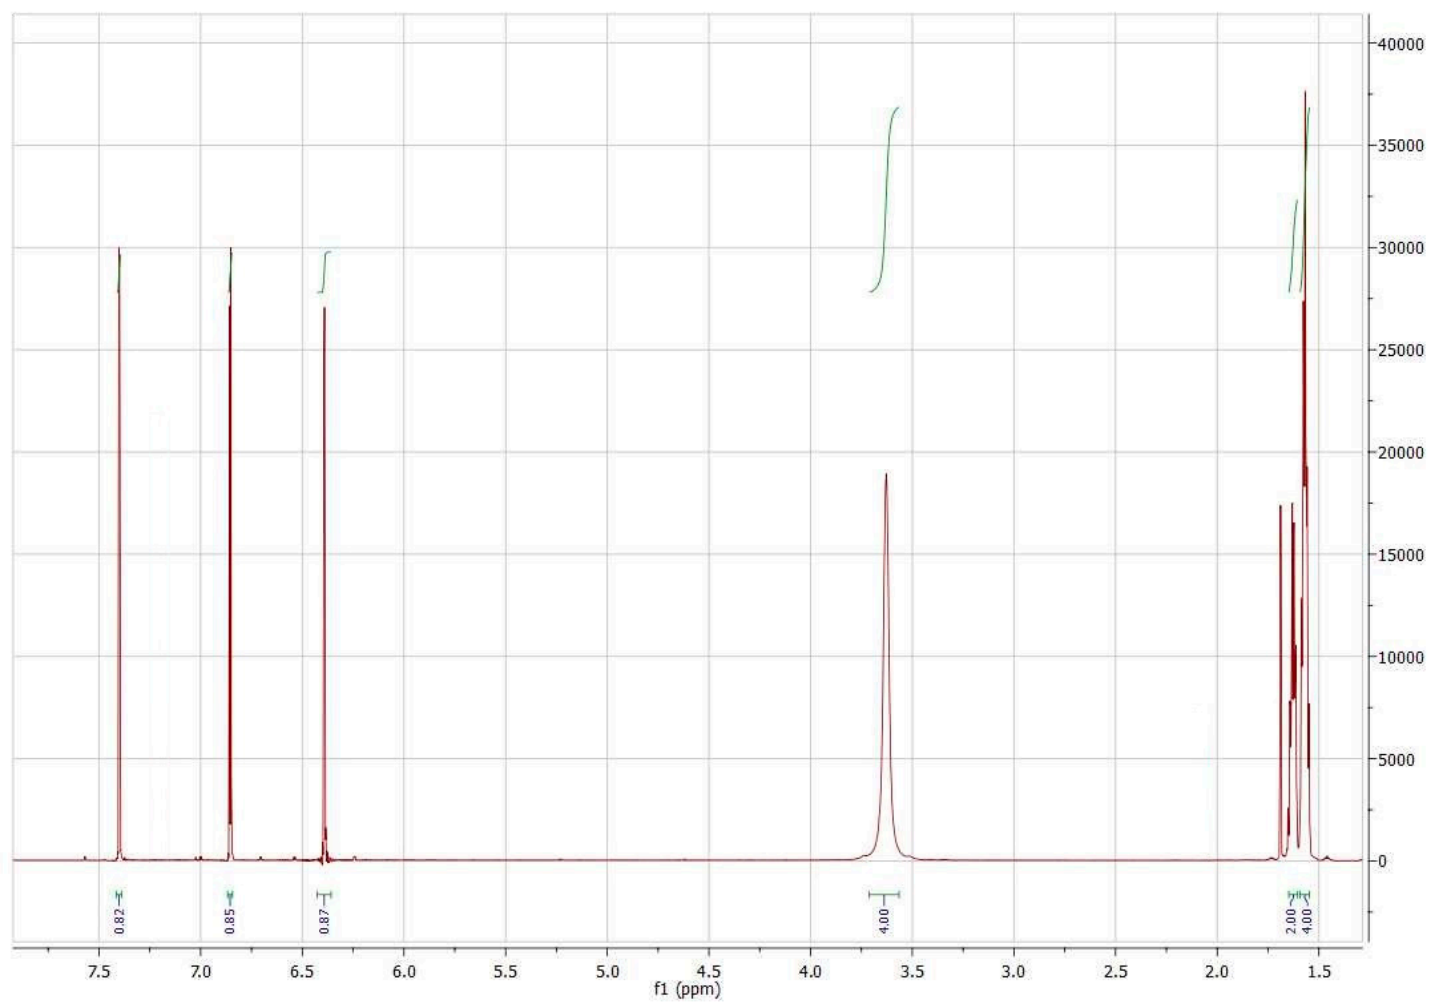

Figure S2.  $^1\text{H}$ -NMR spectrum of compound 7b.

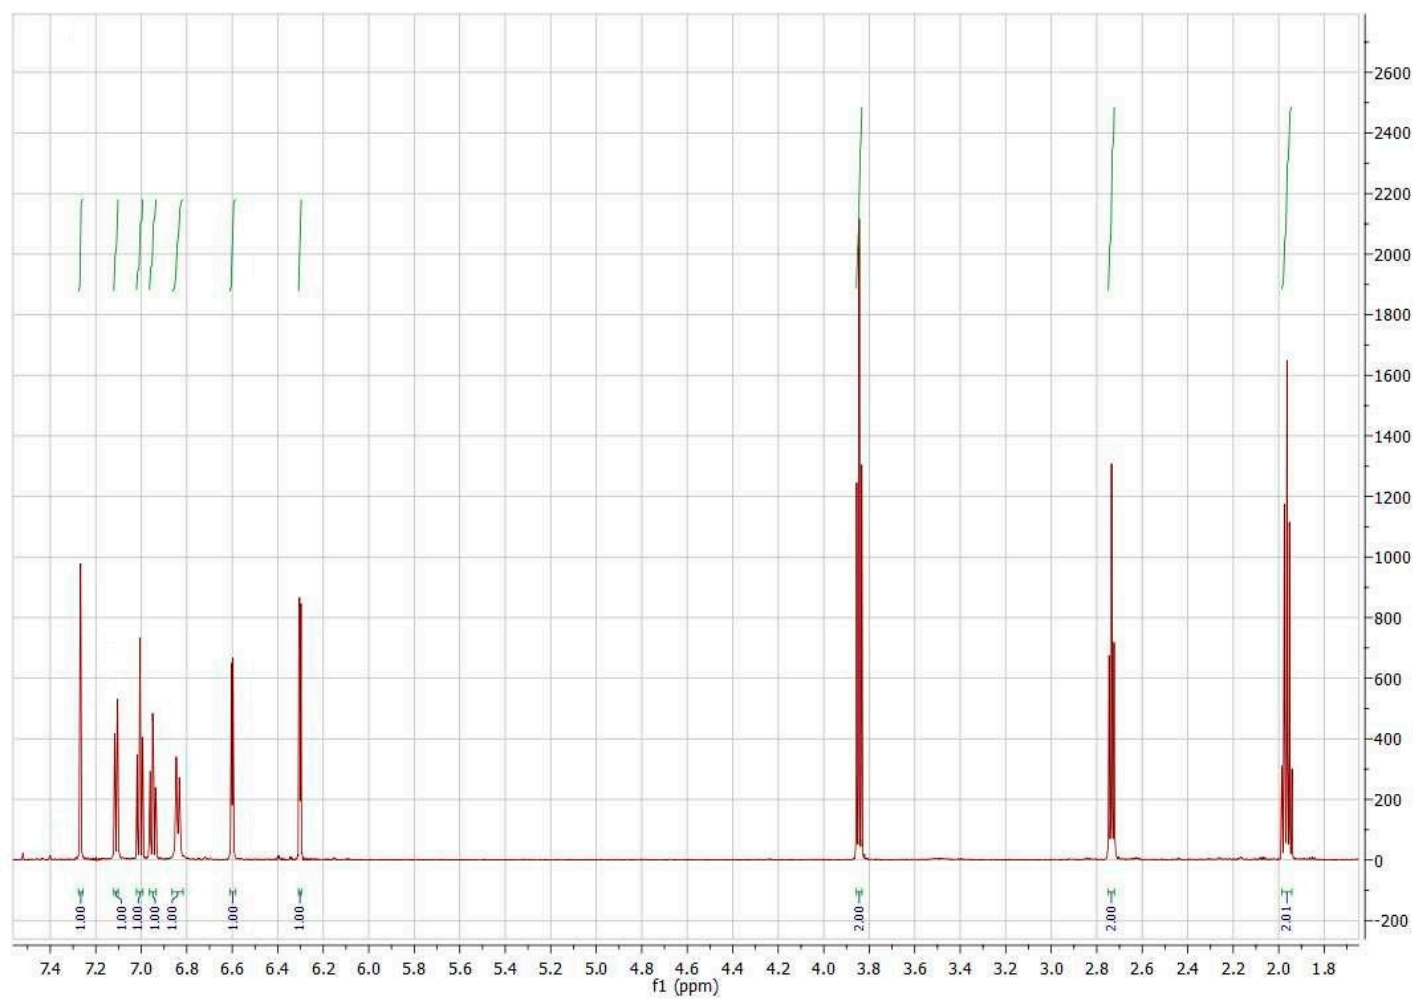

**Figure S3.**  $^1\text{H}$ -NMR spectrum of compound 7c.

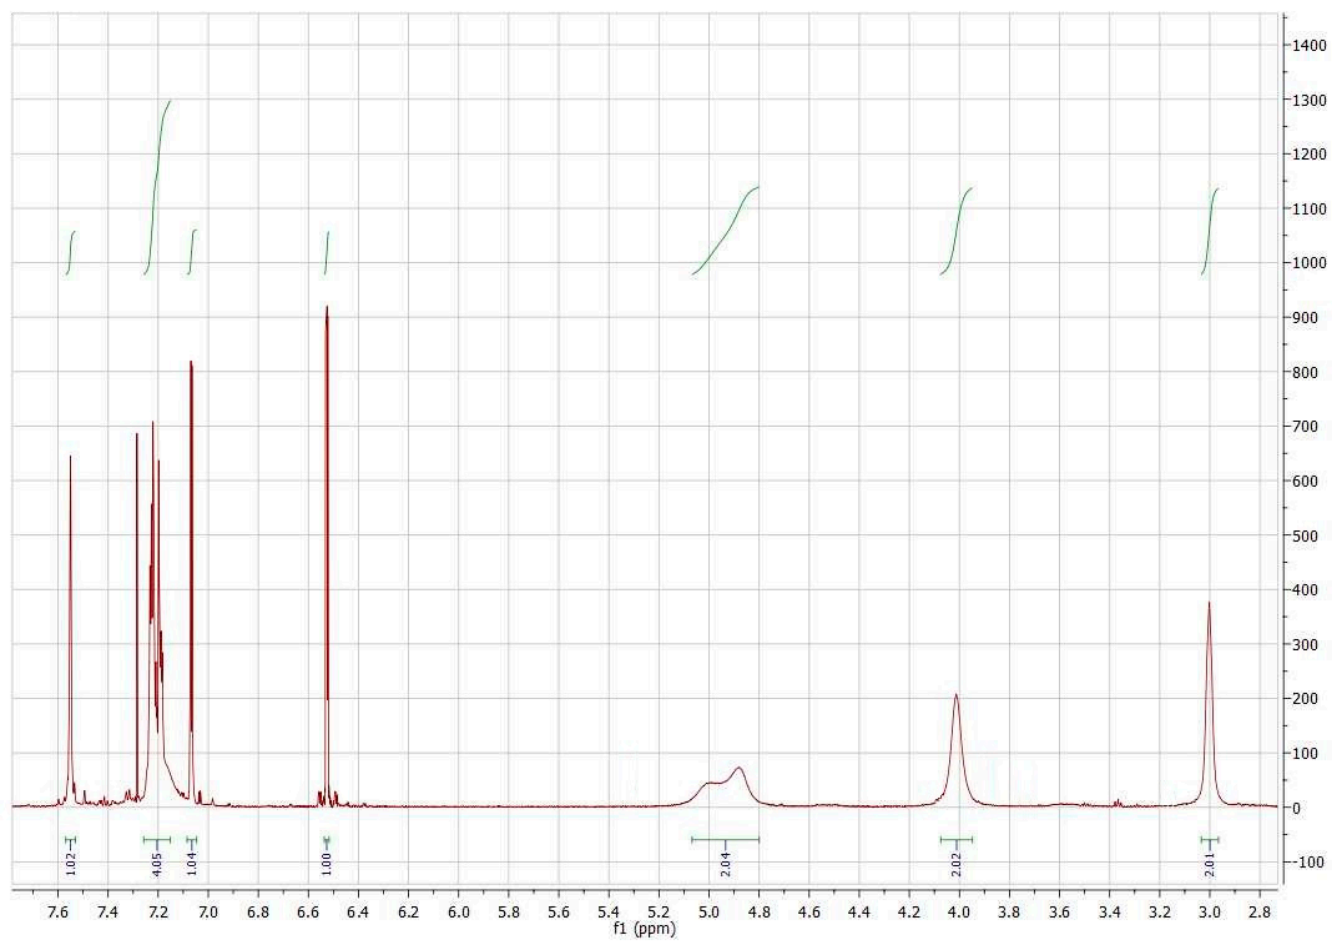

**Figure S4.**  $^1\text{H}$ -NMR spectrum of compound 7d.

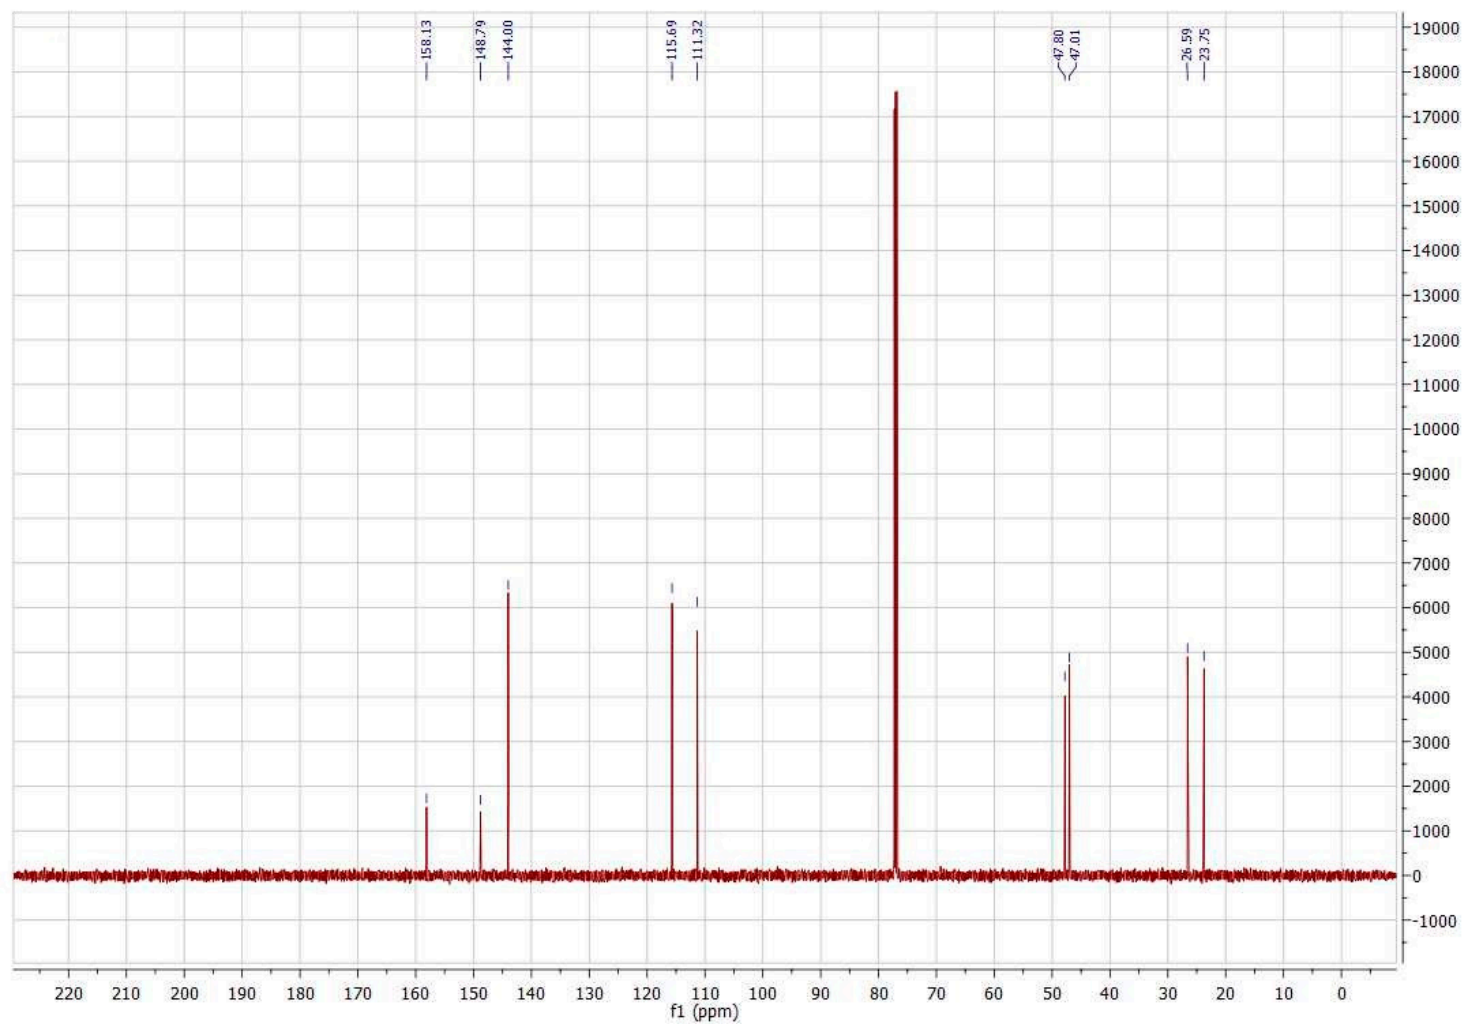

**Figure S5.**  $^{13}\text{C}$ -NMR spectrum of compound **7a**.

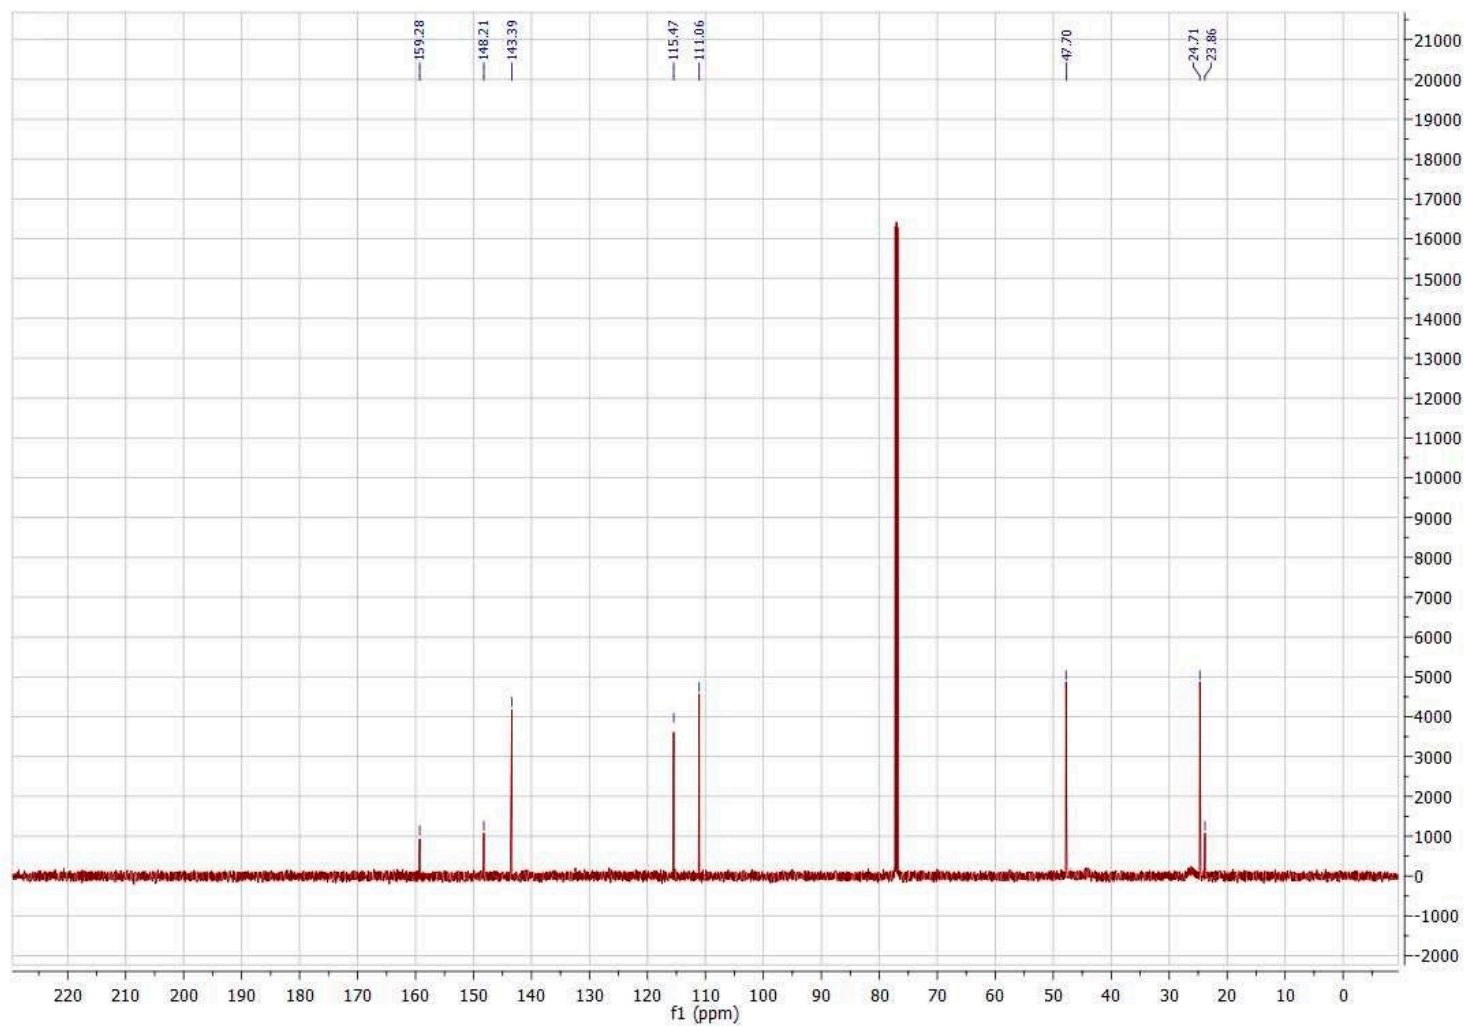

**Figure S6.** <sup>13</sup>C-NMR spectrum of compound 7b.



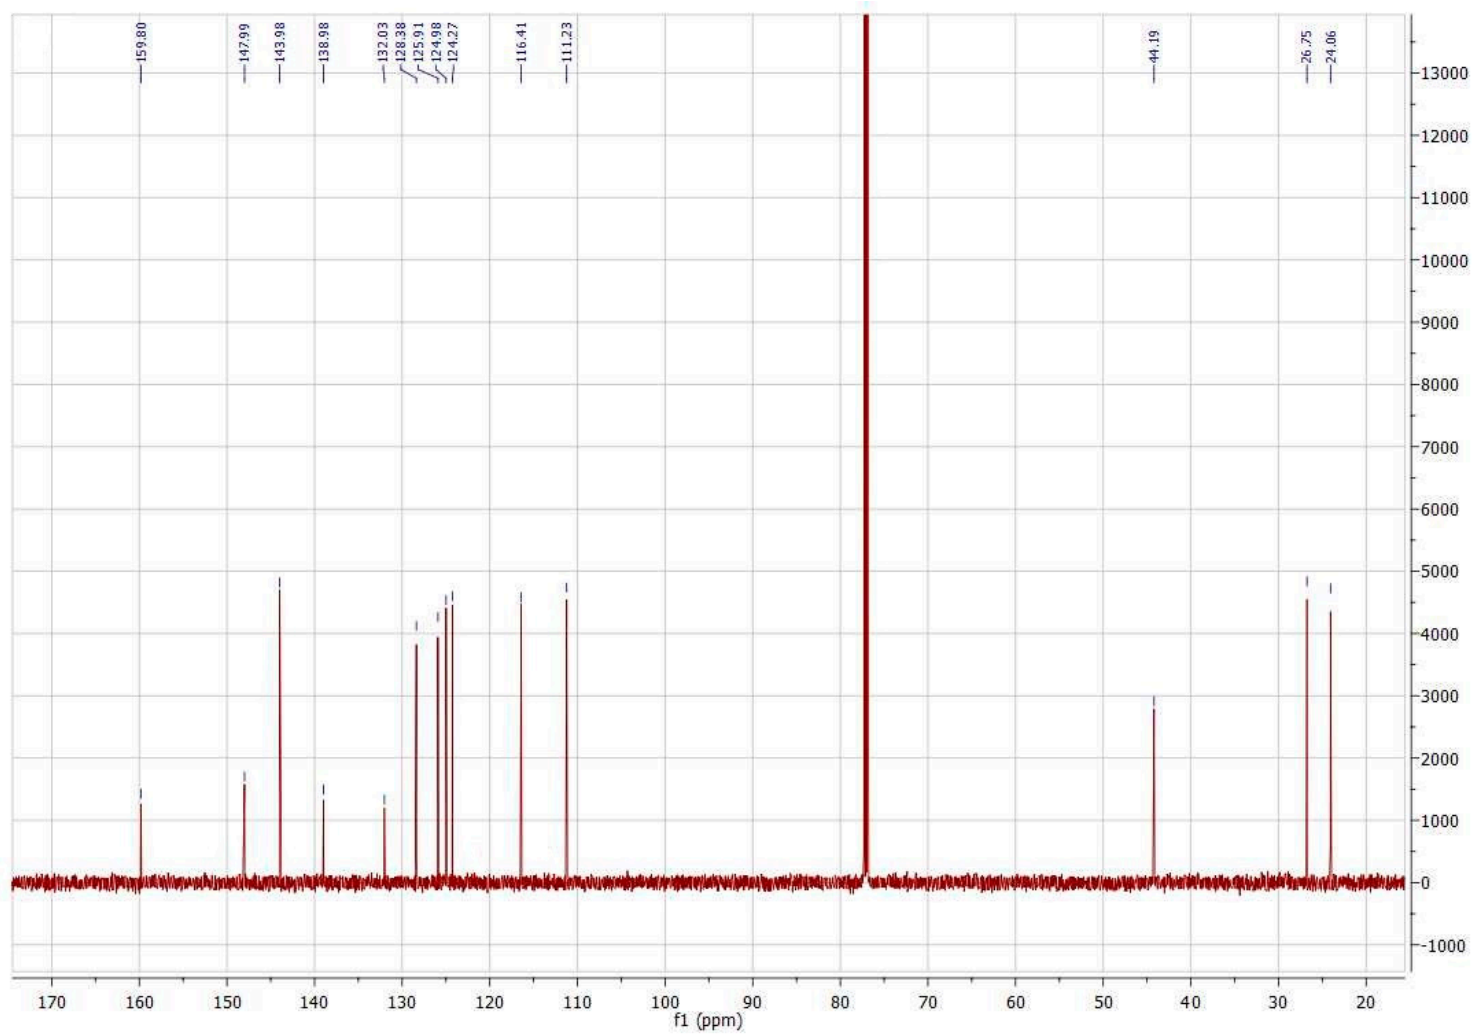

**Figure S7.**  $^{13}\text{C}$ -NMR spectrum of compound 7c.

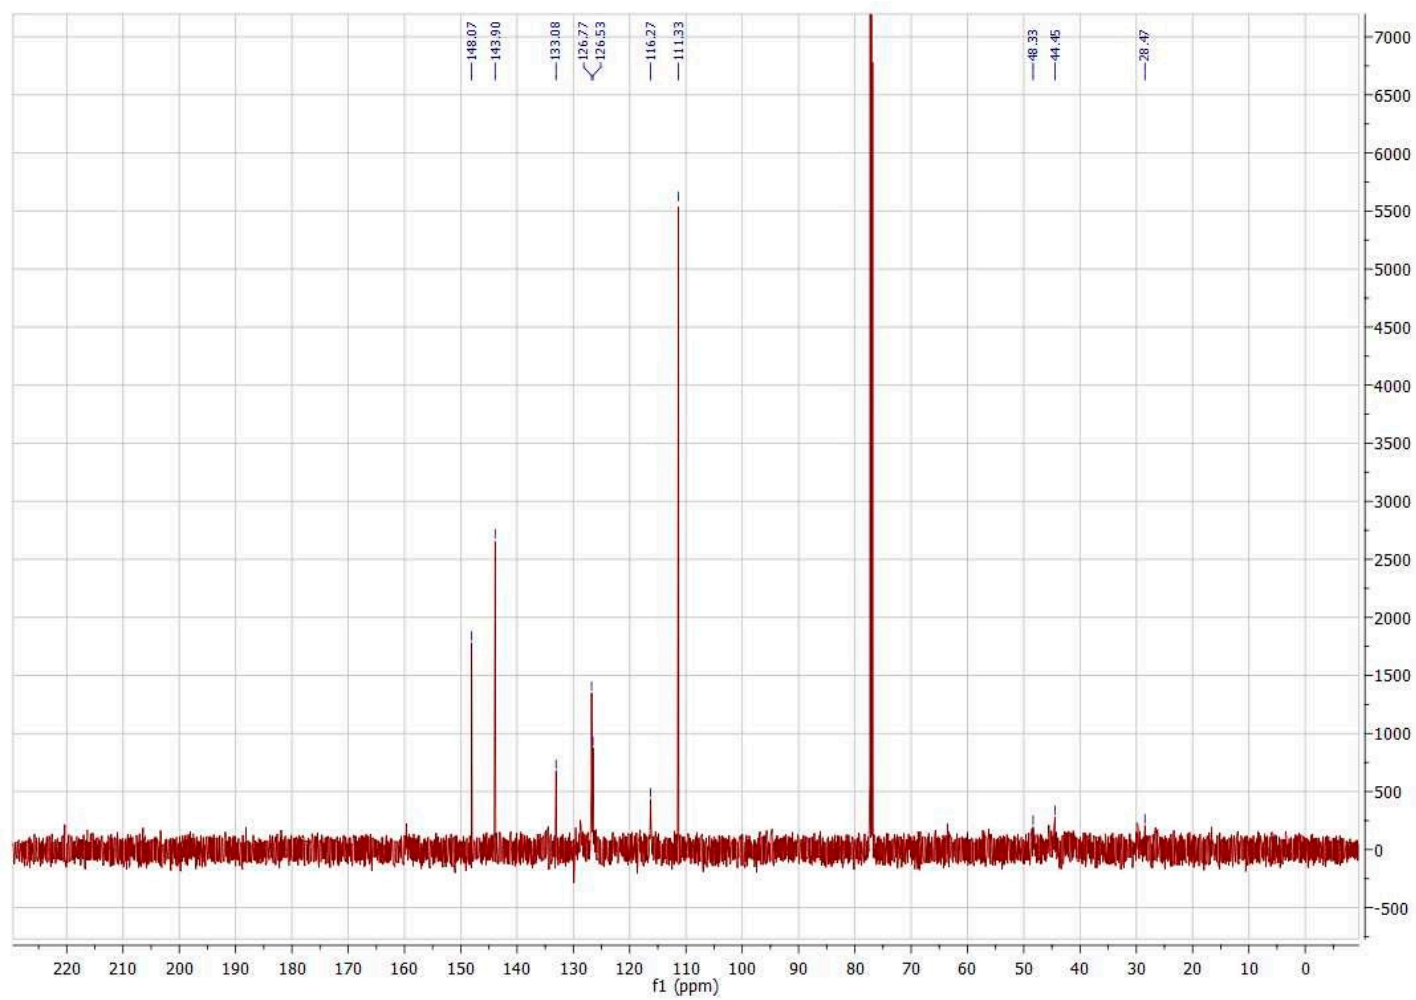

**Figure S8.**  $^{13}\text{C}$ -NMR spectrum of compound 7d.

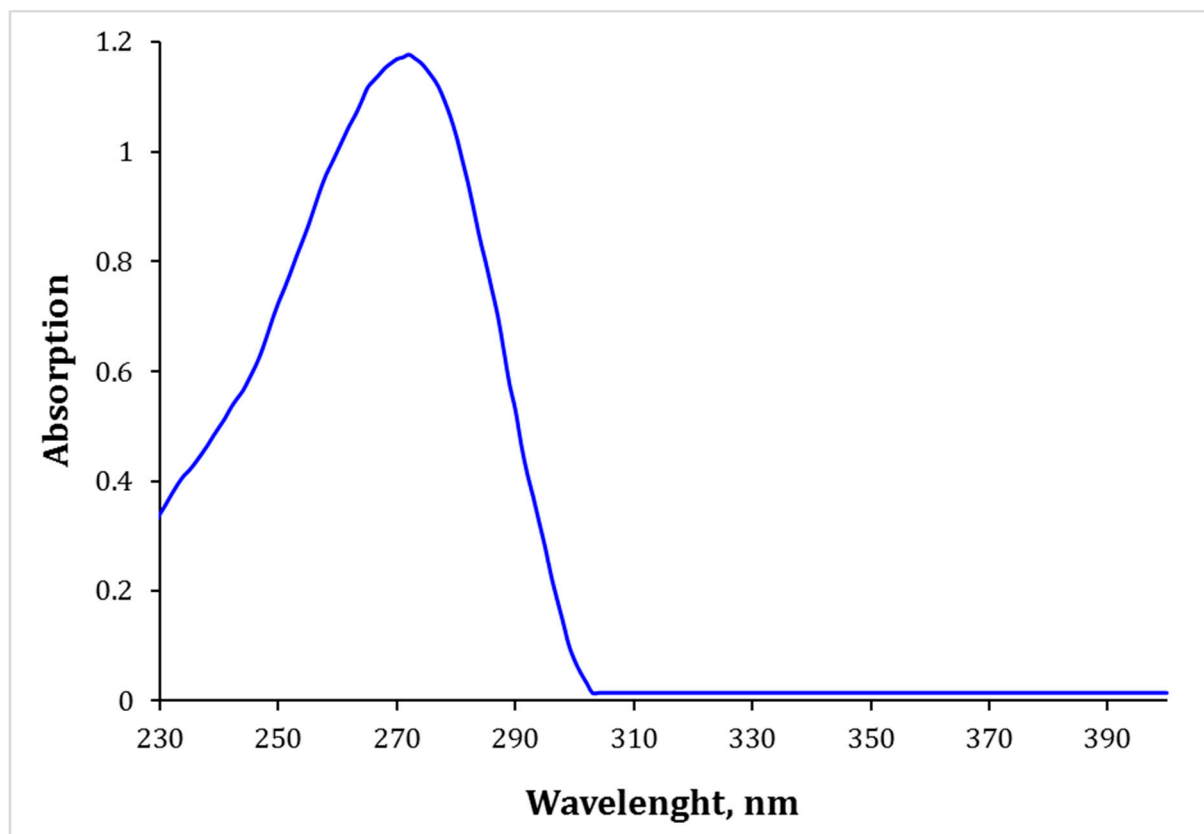

**Figure S9.** UV spectrum of compound **7a**.

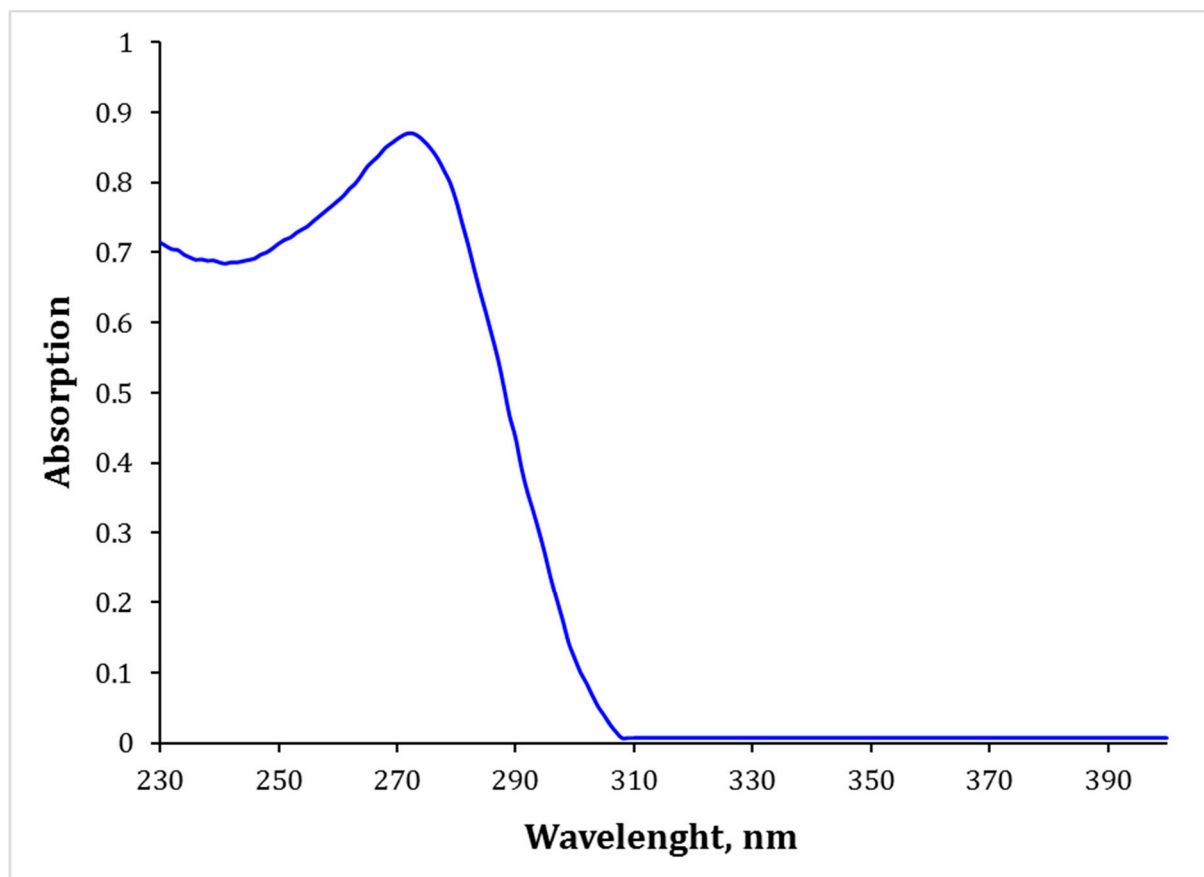

**Figure S10.** UV spectrum of compound **7b**.

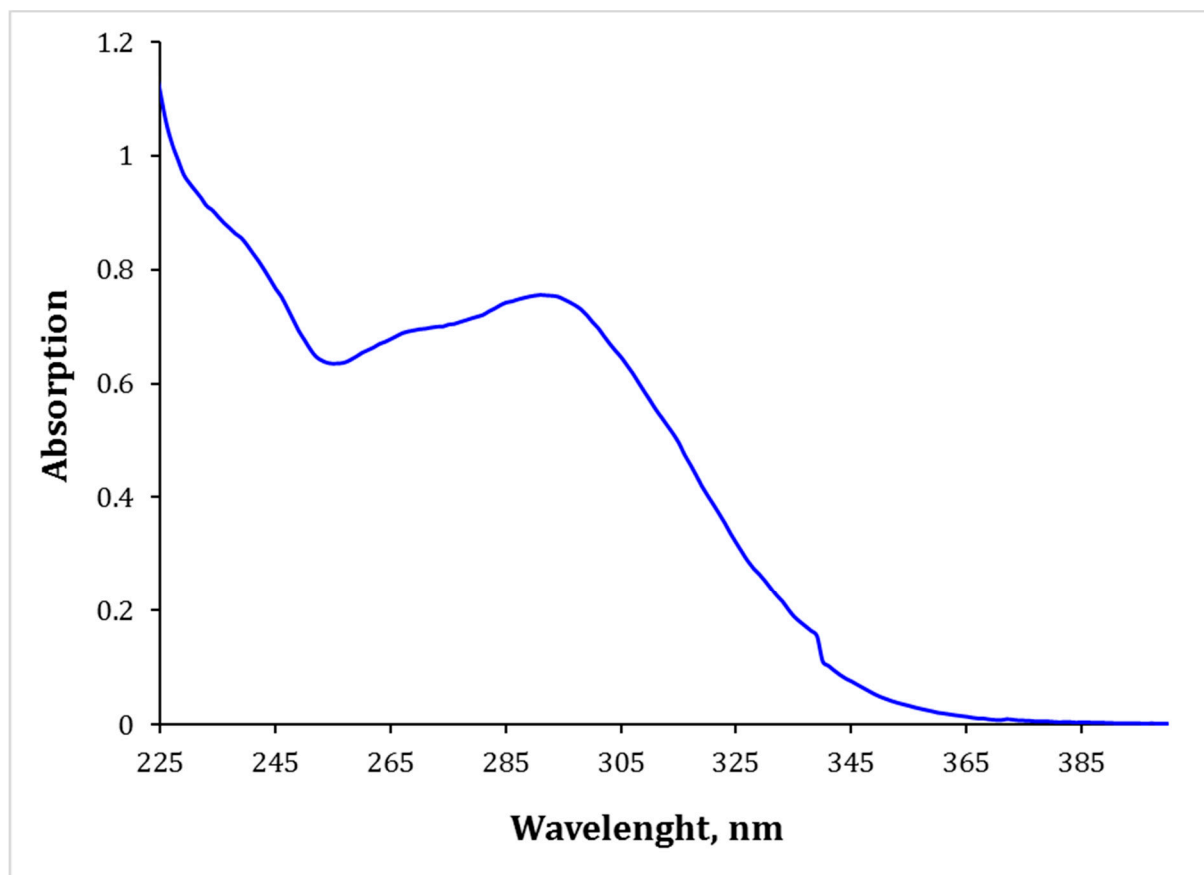

**Figure S11.** UV spectrum of compound **7c**.

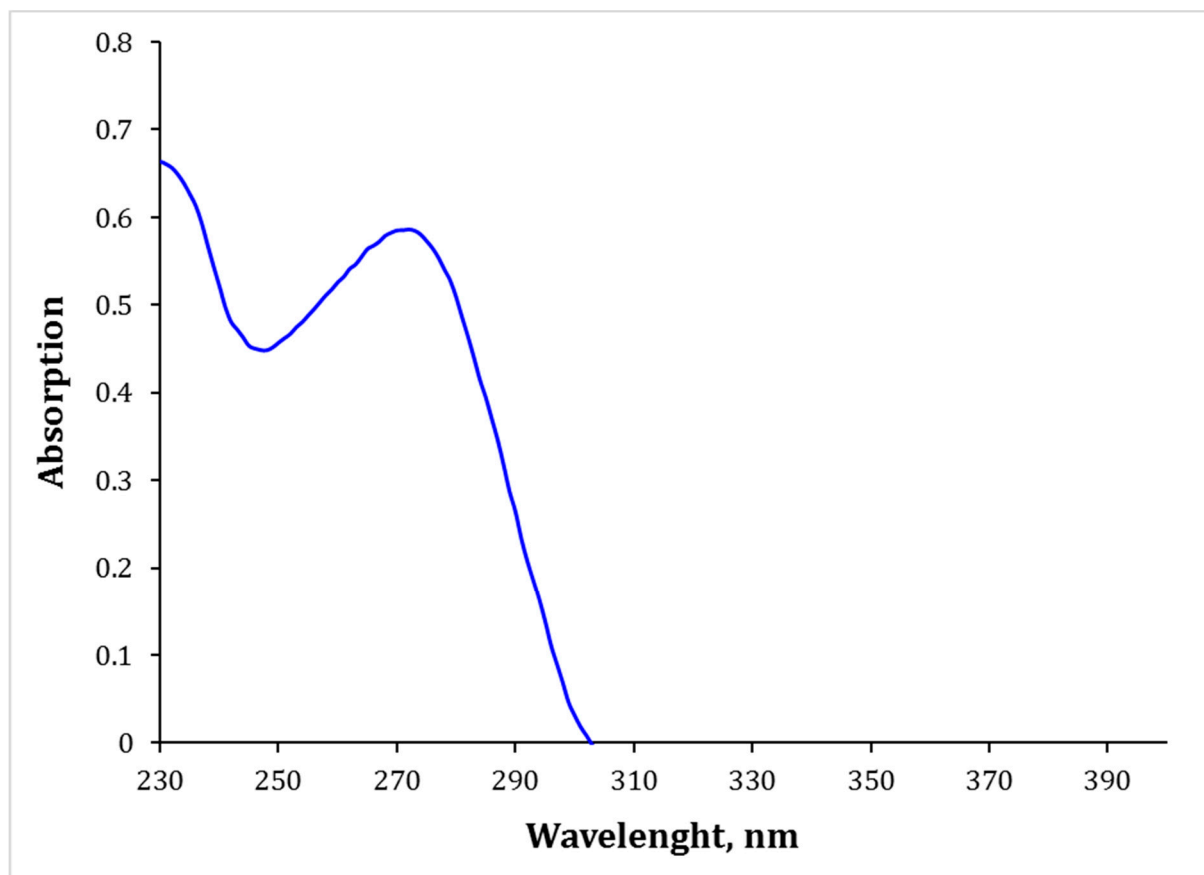

**Figure S12.** UV spectrum of compound **7d**.

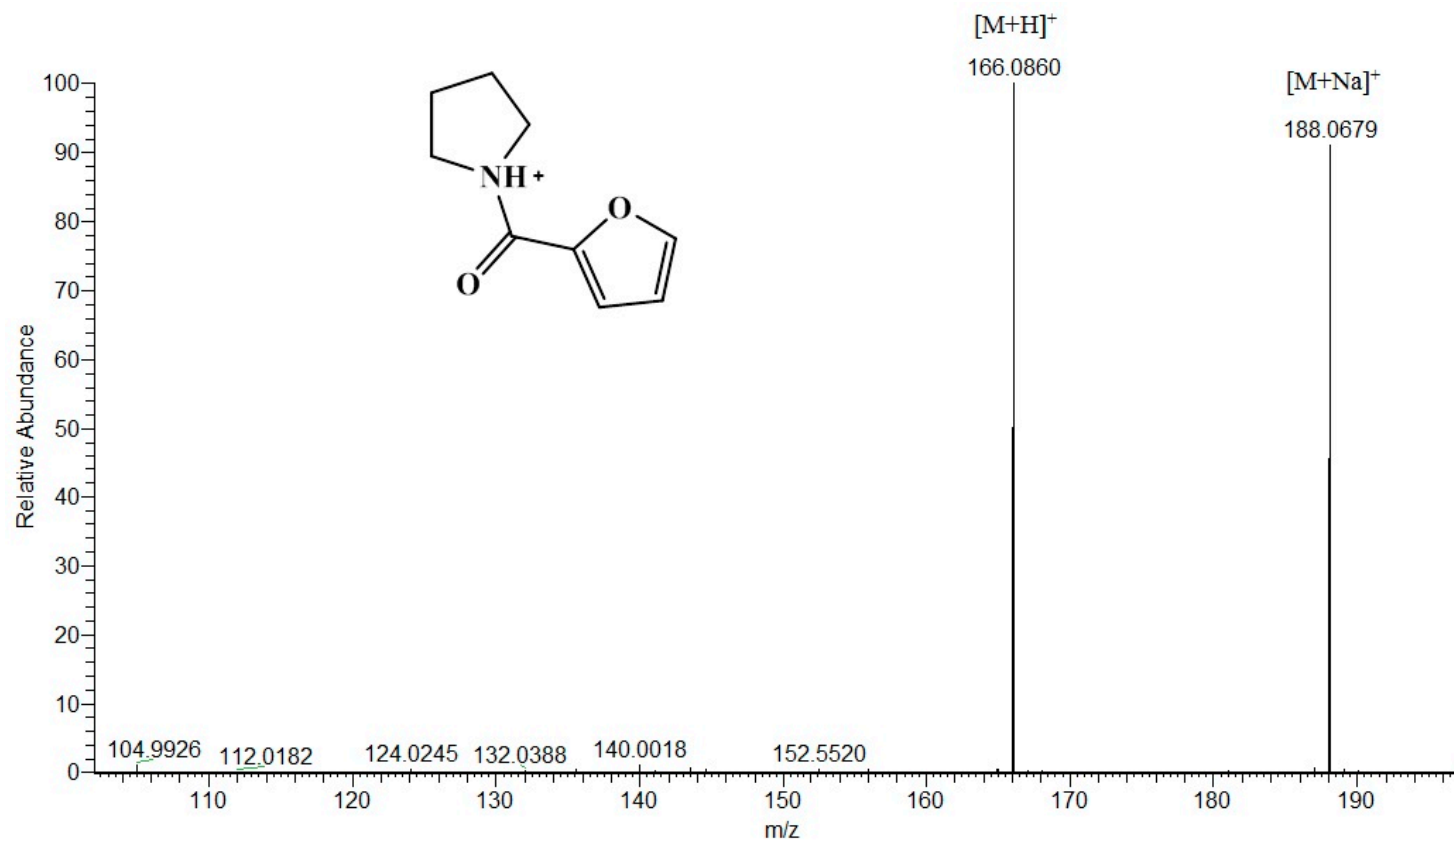

**Figure S13.** ESI-HRMS of compound **7a**.

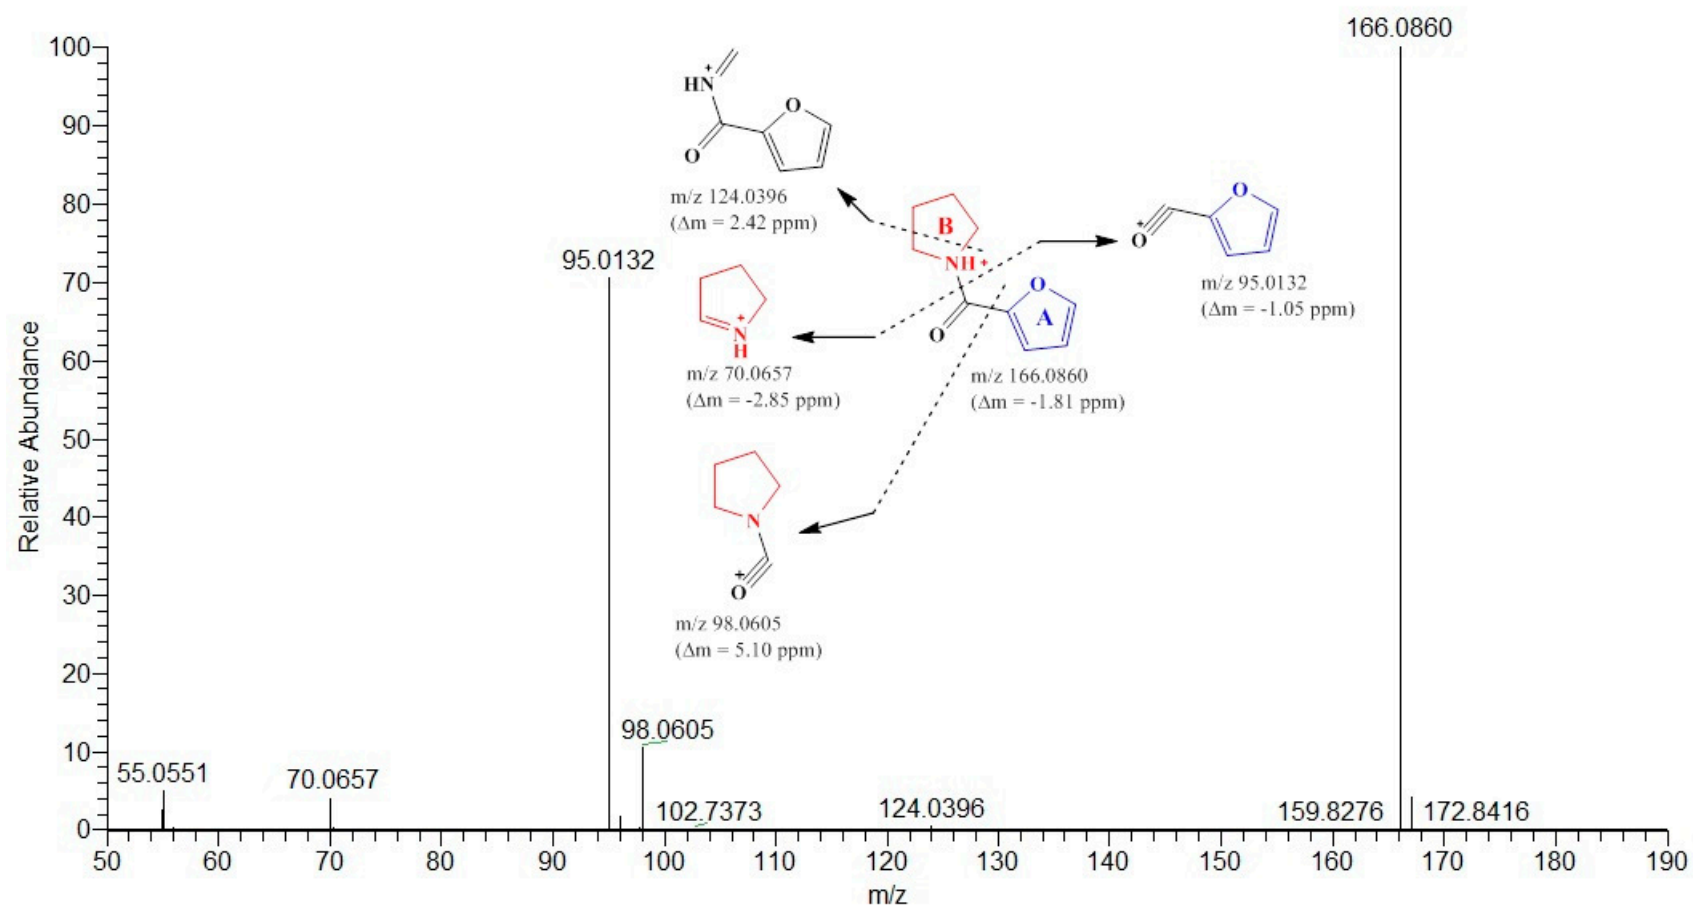

**Figure S14.** Mass spectrum of **7a** obtained by positive ion ESI-MS/MS. Proposed fragmentation of protonated **7a**.



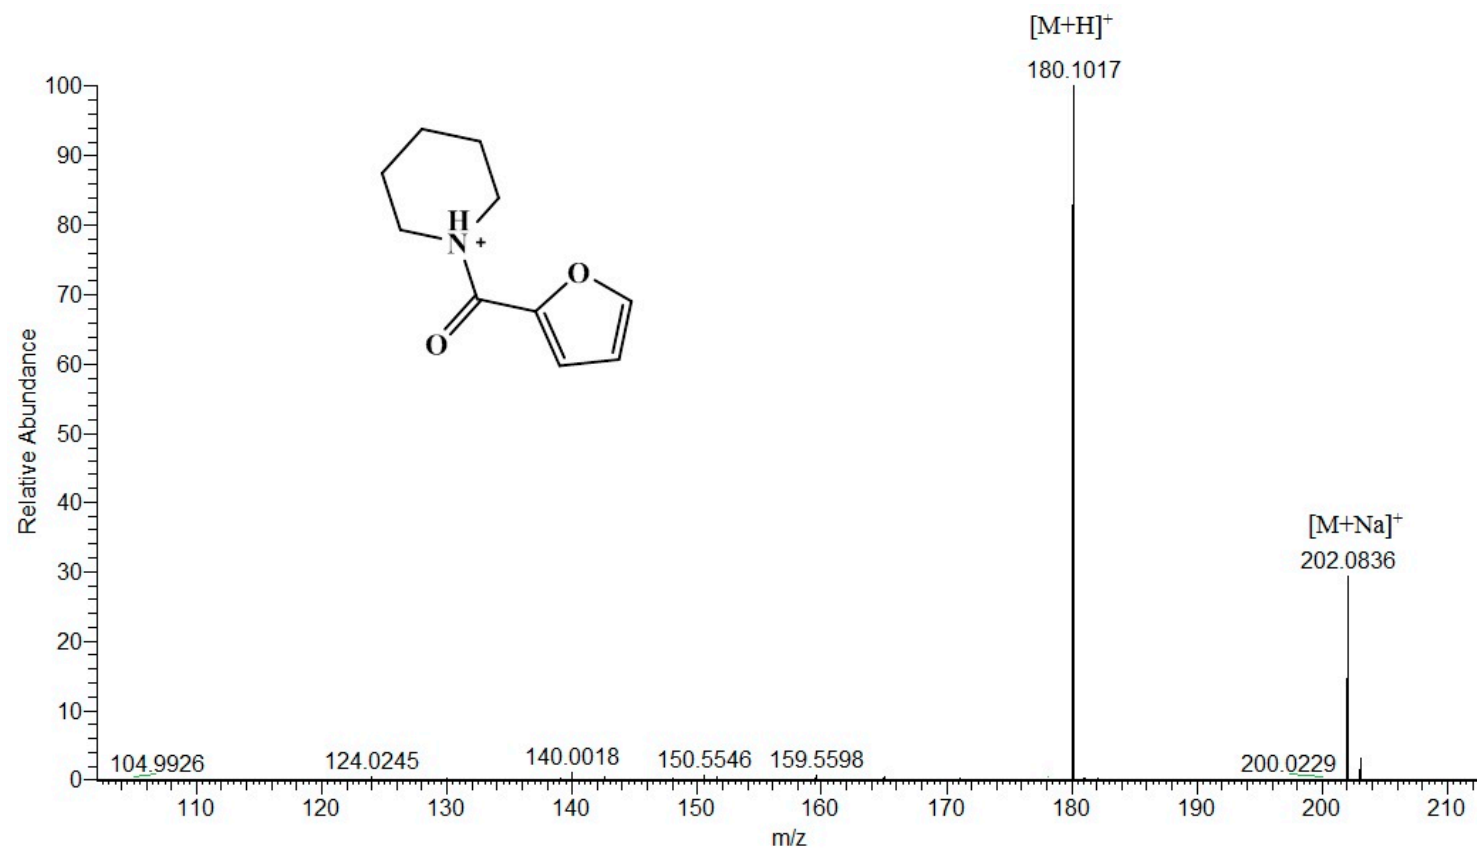

**Figure S15.** ESI-HRMS of compound **7b**.

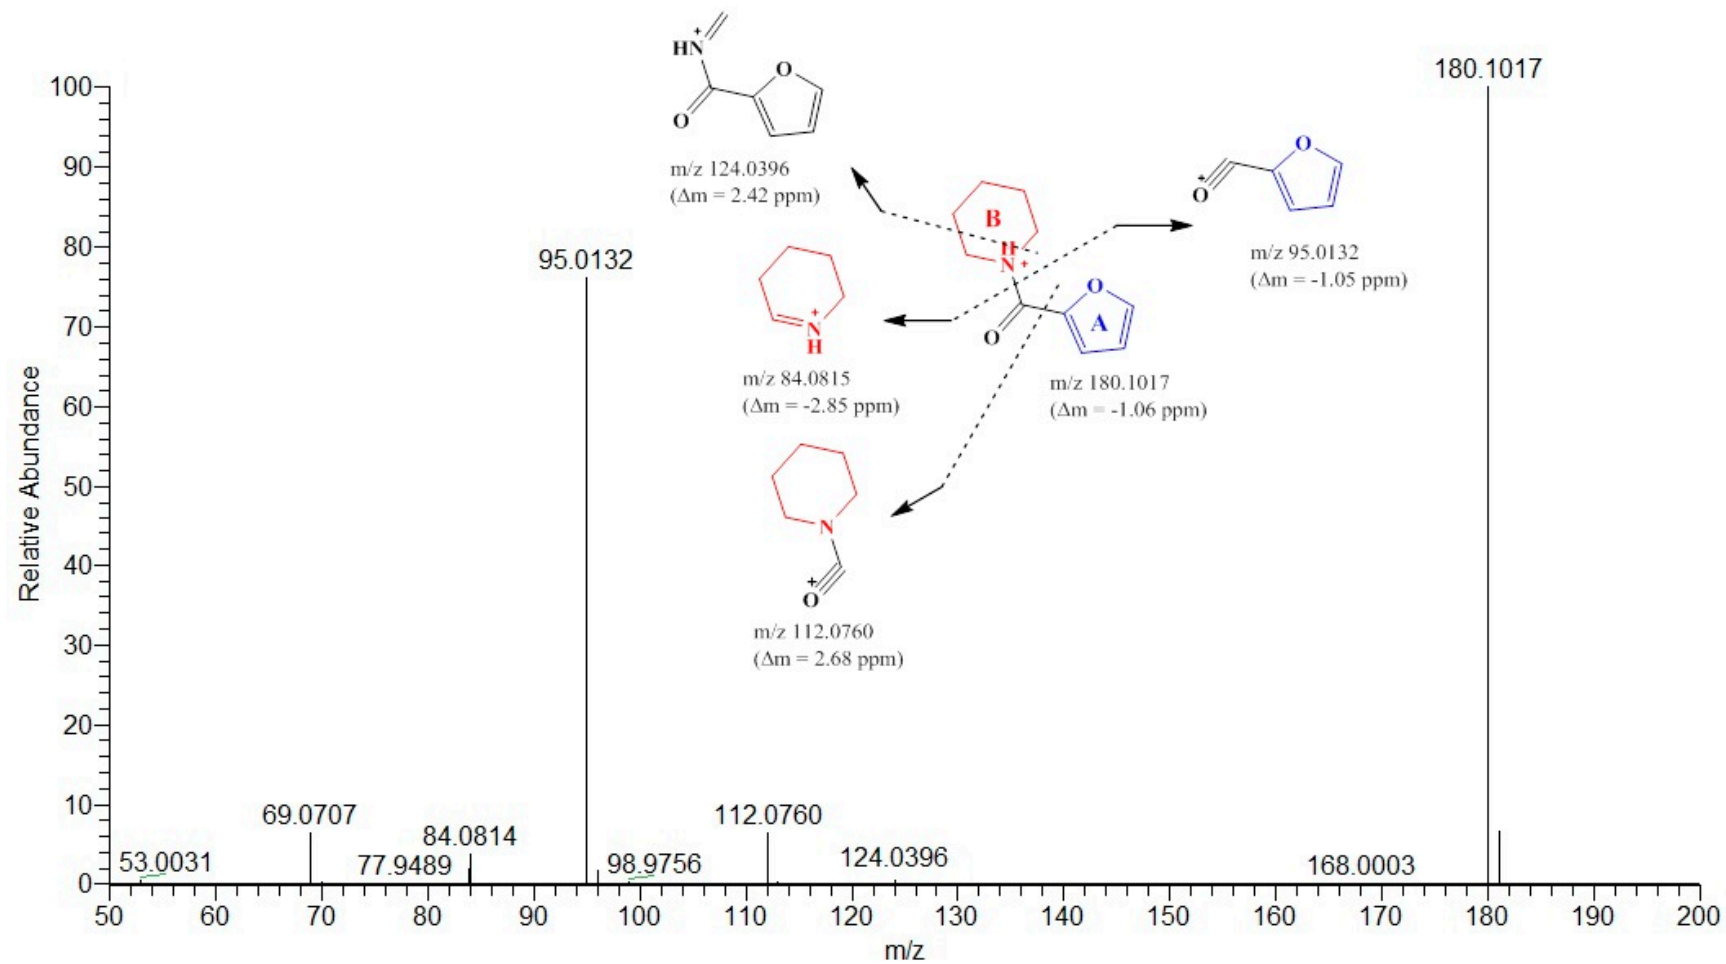

**Figure S16.** Mass spectrum of **7b** obtained by positive ion ESI-MS/MS. Proposed fragmentation of protonated **7b**.

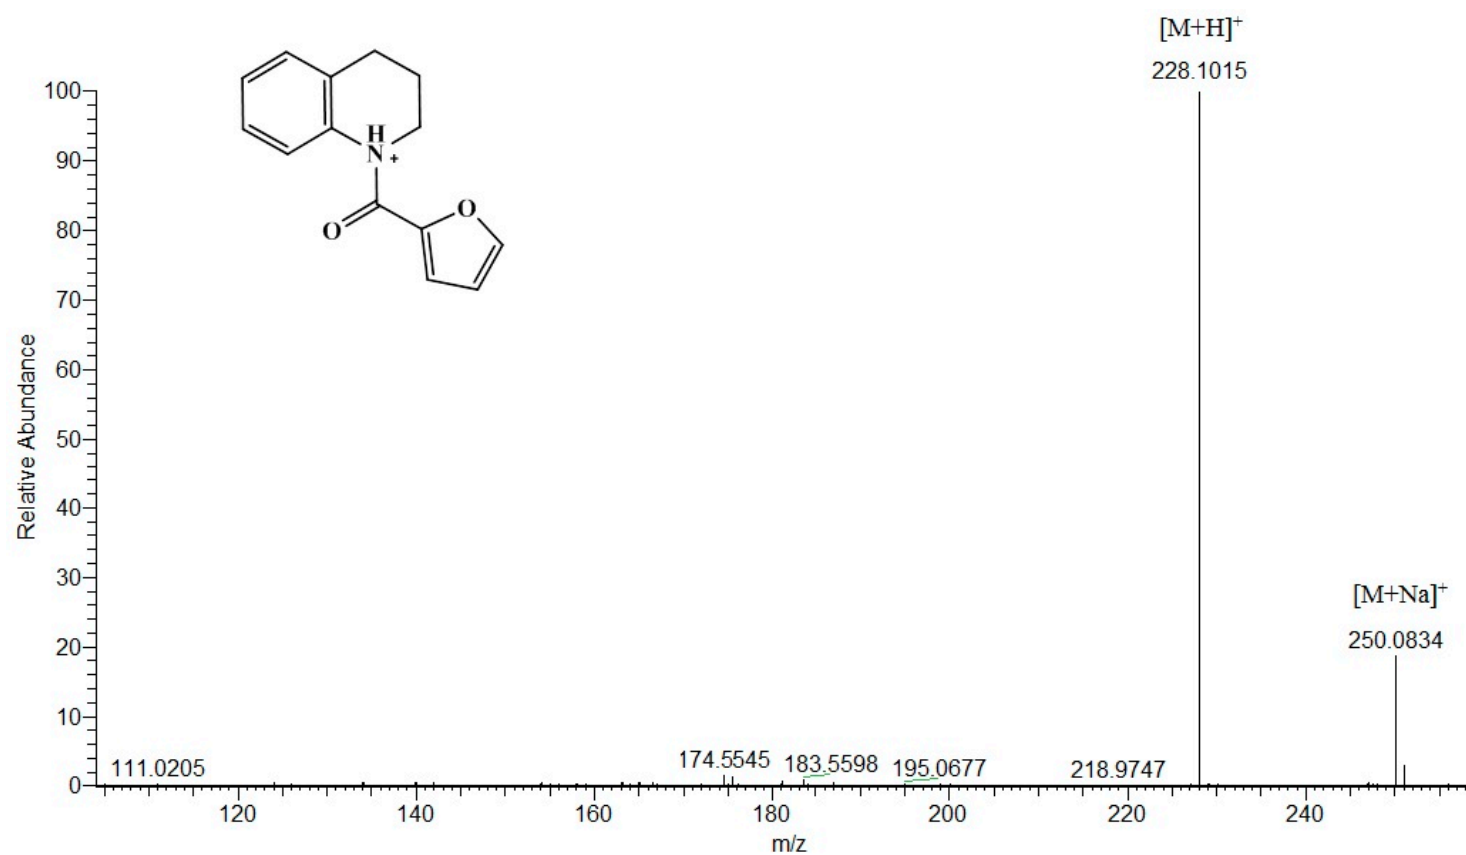

**Figure S17.** ESI-HRMS of compound **7c**.

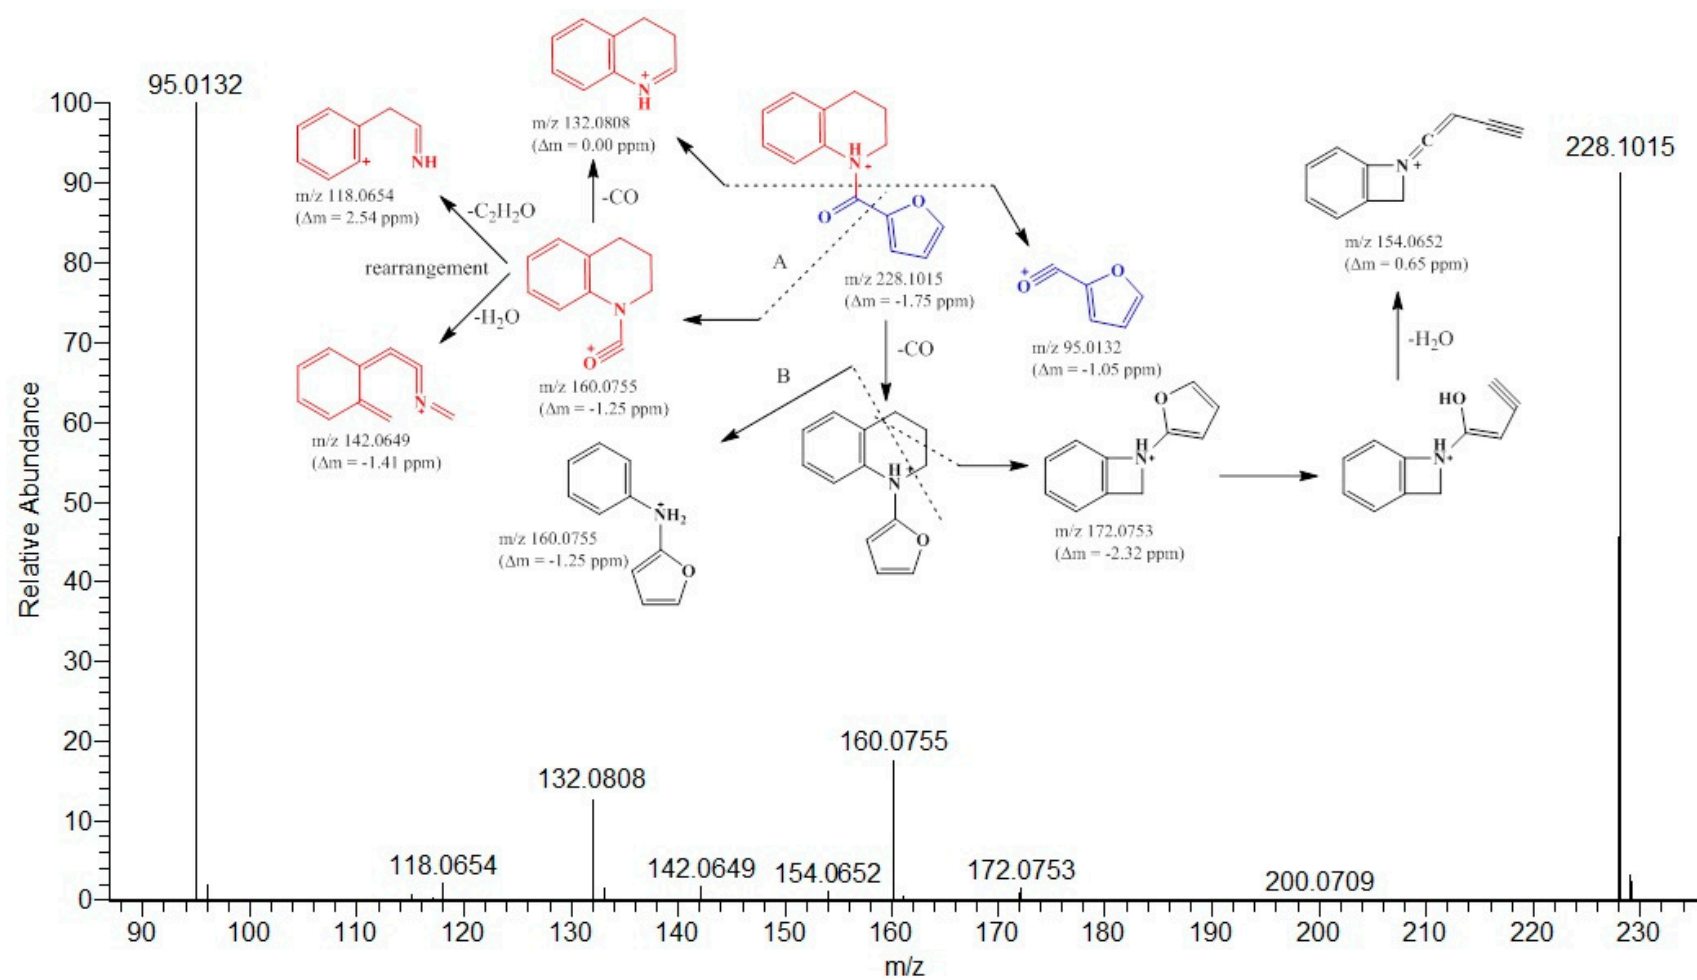

**Figure S18.** Mass spectrum of **7c** obtained by positive ion ESI-MS/MS. Proposed fragmentation of protonated **7c**.

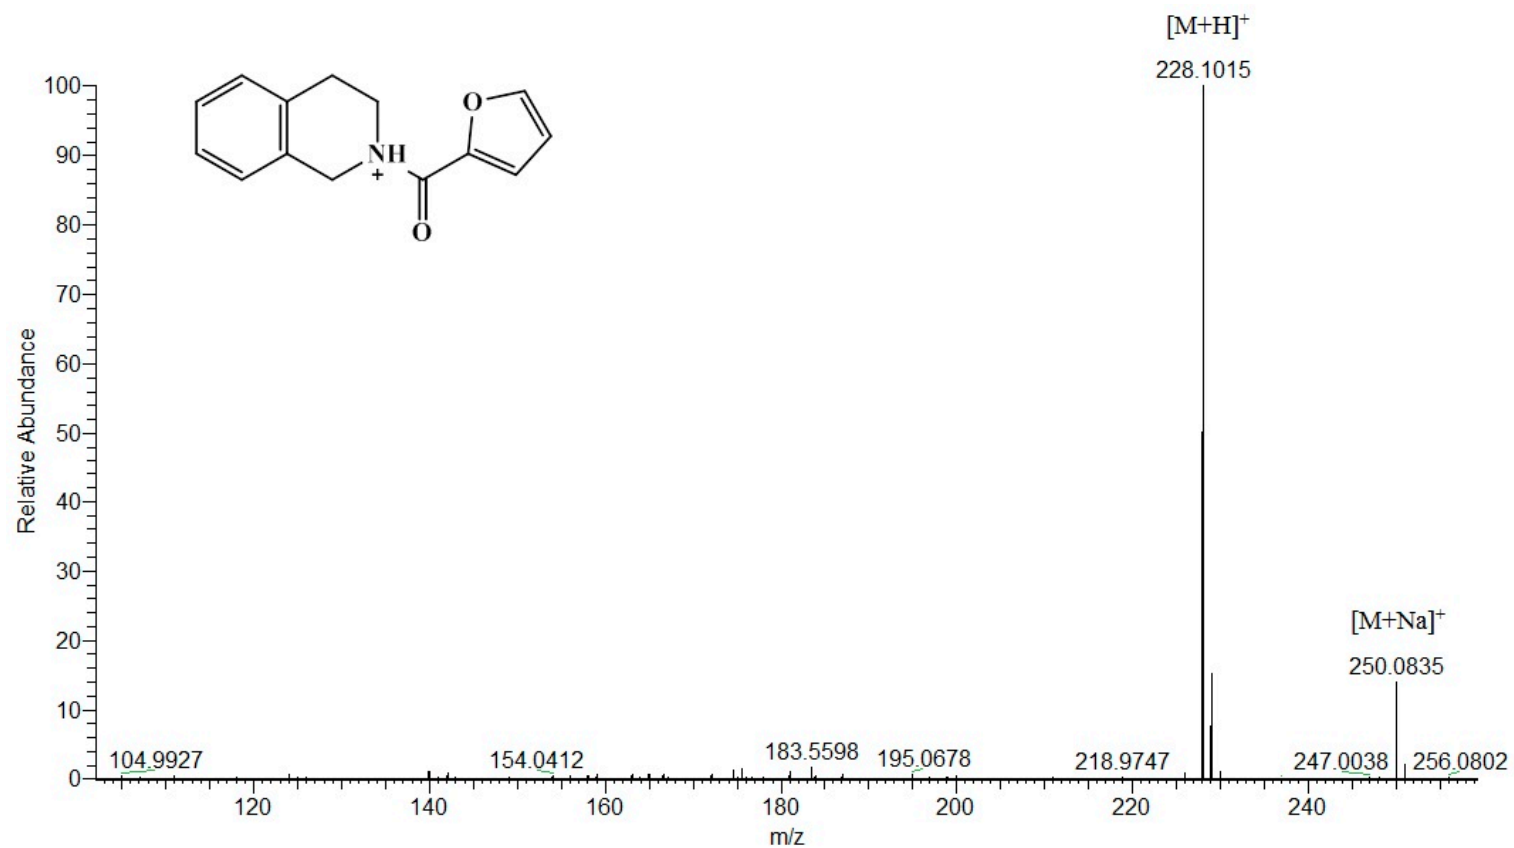

**Figure S19.** ESI-HRMS of compound **7d**.

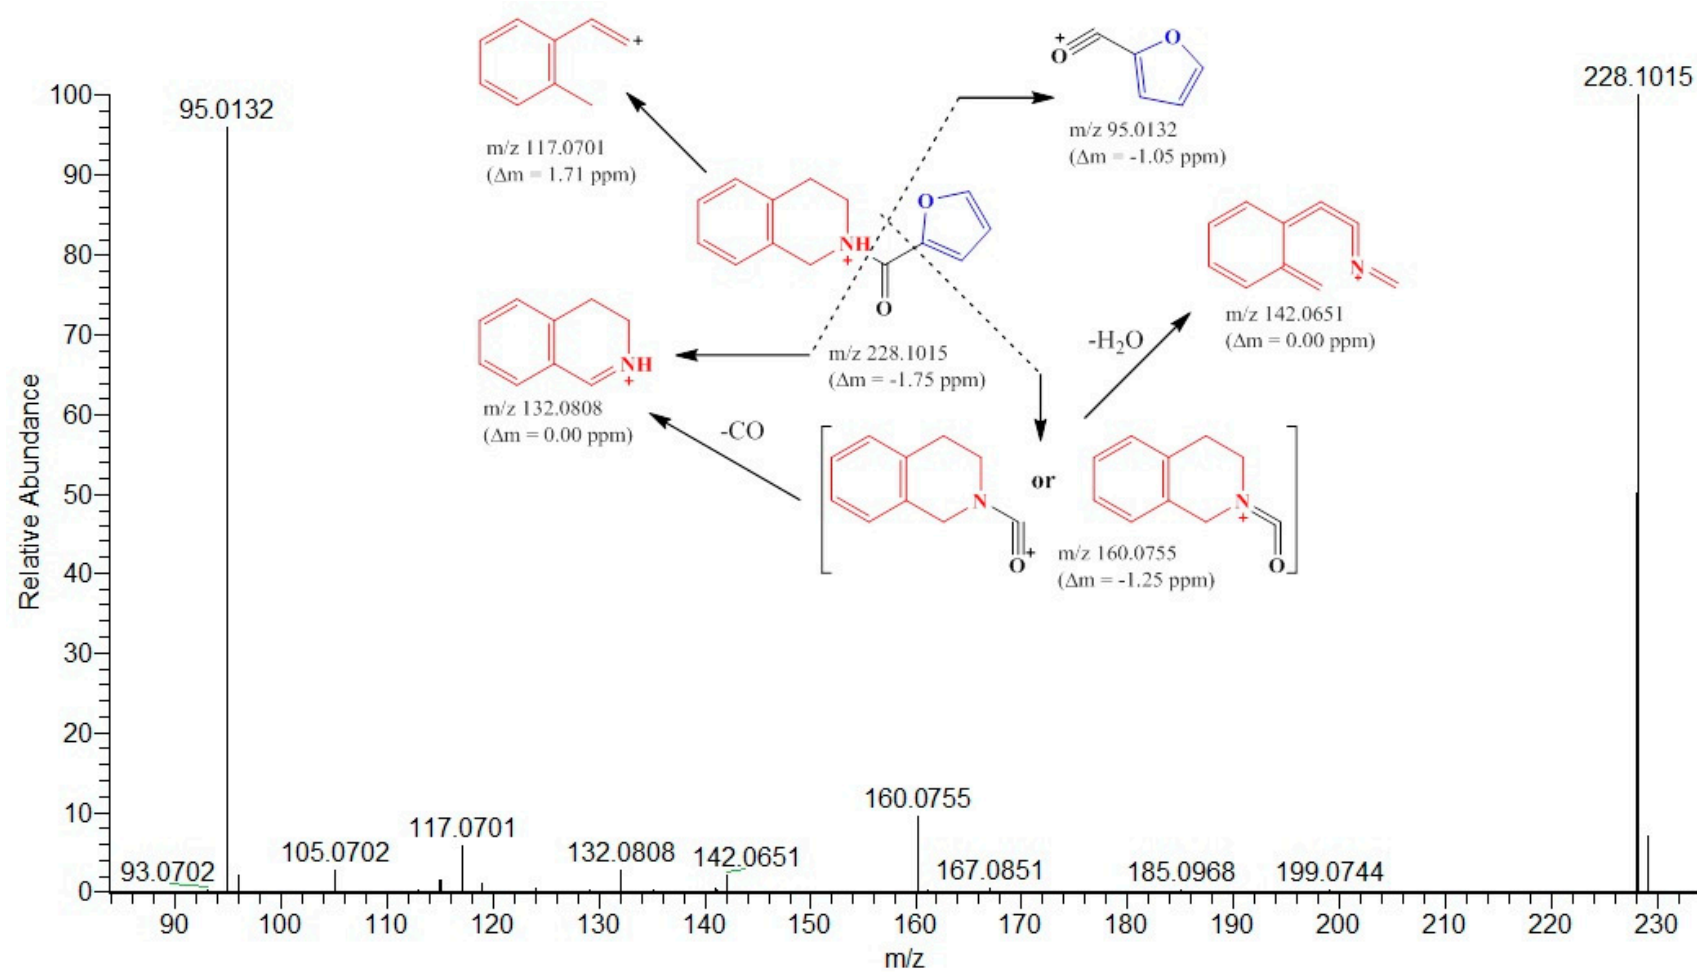

Figure S20. Mass spectrum of **7d** obtained by positive ion ESI-MS/MS. Proposed fragmentation of protonated **7d**.
